# Supplementary material for: Analysis of Heavy Metal Sources in the Soil of Riverbanks Across an Urbanization Gradient
Source: PubMed Central journal article supplement (PMC6209923; doi:10.3390/ijerph15102175), 2018-10-04
Supplement: ijerph-15-02175-s001.pdf [file ijerph-15-02175-s001.pdf]

**Table S1.** Source of the samples

| <b>Urban gradient</b> | <b>Number</b> | <b>Longitude</b> | <b>Latitude</b> |
|-----------------------|---------------|------------------|-----------------|
| Core urban            | ZX1           | 121.6136111      | 29.8980556      |
| Core urban            | ZX2           | 121.6016667      | 29.9086111      |
| Core urban            | ZX3           | 121.5913889      | 29.8961111      |
| Core urban            | ZX4           | 121.6144444      | 29.8988889      |
| Core urban            | ZX5           | 121.5736111      | 29.8894444      |
| Core urban            | ZX6           | 121.5641667      | 29.8966667      |
| Core urban            | ZX7           | 121.5616667      | 29.8788889      |
| Core urban            | ZX8           | 121.5533333      | 29.8747222      |
| Core urban            | ZX9           | 121.5480556      | 29.8533333      |
| Core urban            | ZX10          | 121.5438889      | 29.8572222      |
| Core urban            | ZX11          | 121.5347222      | 29.8477778      |
| Core urban            | ZX12          | 121.5286111      | 29.8450000      |
| Core urban            | ZX13          | 121.5097222      | 29.8858333      |
| Suburb                | ZX14          | 121.5225000      | 29.8058333      |
| Suburb                | ZX15          | 121.5150000      | 29.8077778      |
| Suburb                | ZX16          | 121.4950000      | 29.8055556      |
| Suburb                | ZX17          | 121.4822222      | 29.7736111      |
| Suburb                | ZX18          | 121.4616667      | 29.7916667      |
| Suburb                | ZX19          | 121.4375000      | 29.7800000      |
| Suburb                | ZX20          | 121.4086111      | 29.7752778      |
| Suburb                | ZX21          | 121.3863889      | 29.7758333      |
| Exurb                 | ZX22          | 121.3636111      | 29.7647222      |
| Exurb                 | ZX23          | 121.3452778      | 29.7775000      |
| Exurb                 | ZX24          | 121.3341667      | 29.7741667      |
| Exurb                 | ZX25          | 121.6202778      | 29.9047222      |
| Exurb                 | ZX26          | 121.3161111      | 29.7969444      |

**Table S1. Cont.**

|       |      |             |            |
|-------|------|-------------|------------|
| Exurb | ZX27 | 121.3208333 | 29.7844444 |
| Exurb | ZX28 | 121.3008333 | 29.8183333 |
| Exurb | ZX29 | 121.2919444 | 29.8166667 |
| Exurb | ZX30 | 121.2655556 | 29.8430556 |

**Table S2.** Operational parameters of the analysis by ICP-MS

| Parameters                                | Value                                                                                                                                               |
|-------------------------------------------|-----------------------------------------------------------------------------------------------------------------------------------------------------|
| RF power (W)                              | 1550                                                                                                                                                |
| Nebulizer gas flow (L min <sup>-1</sup> ) | 1.04                                                                                                                                                |
| Auxiliary gas flow (L min <sup>-1</sup> ) | 0.8                                                                                                                                                 |
| Cooling gas flow (L min <sup>-1</sup> )   | 14                                                                                                                                                  |
| Extraction Lens 2 (V)                     | -106.7                                                                                                                                              |
| CCT Focus Lens (V)                        | -11.40                                                                                                                                              |
| Sampling cone (mm)                        | 1.0, Ni cone                                                                                                                                        |
| Skimmer cone (mm)                         | 0.5, Ni cone                                                                                                                                        |
| Isotopes monitored                        | <sup>52</sup> Cr, <sup>60</sup> Ni, <sup>63</sup> Cu, <sup>66</sup> Zn,<br><sup>75</sup> As, <sup>11</sup> Cd, <sup>121</sup> Sb, <sup>208</sup> Pb |
| Dwell time (ms)                           | 30                                                                                                                                                  |
| Acquisition mode                          | Peak jumping                                                                                                                                        |
| Collision gas (He, mL min <sup>-1</sup> ) | 4.153                                                                                                                                               |
| Resolution                                | Normal                                                                                                                                              |

**Table S3.** Background values (mg/kg) of eight heavy metals in Ningbo City in 1990

| Element | Number | Order statistics |        |        |         |         | Arithmetic mean | SD     |
|---------|--------|------------------|--------|--------|---------|---------|-----------------|--------|
|         |        | Minimum          | 0.25   | Median | 0.0075  | Maximum |                 |        |
| Cr      | 82     | 10.800           | 37.300 | 63.300 | 77.100  | 190.400 | 62.100          | 28.470 |
| Ni      | 81     | 15.200           | 23.400 | 35.400 | 39.800  | 50.700  | 32.600          | 9.390  |
| Cu      | 82     | 3.200            | 10.300 | 23.500 | 28.000  | 59.900  | 21.100          | 10.870 |
| Zn      | 82     | 28.500           | 67.100 | 82.100 | 111.000 | 344.000 | 99.800          | 56.980 |
| As      | 82     | 1.400            | 5.000  | 6.850  | 9.000   | 19.100  | 7.200           | 3.130  |
| Cd      | 82     | 0.010            | 0.067  | 0.112  | 0.156   | 0.427   | 0.123           | 0.070  |
| Sb      | 17     | 0.610            | 0.780  | 0.910  | 1.030   | 1.480   | 0.920           | 0.203  |
| Pb      | 82     | 12.900           | 21.750 | 27.000 | 31.750  | 80.200  | 28.100          | 10.140 |

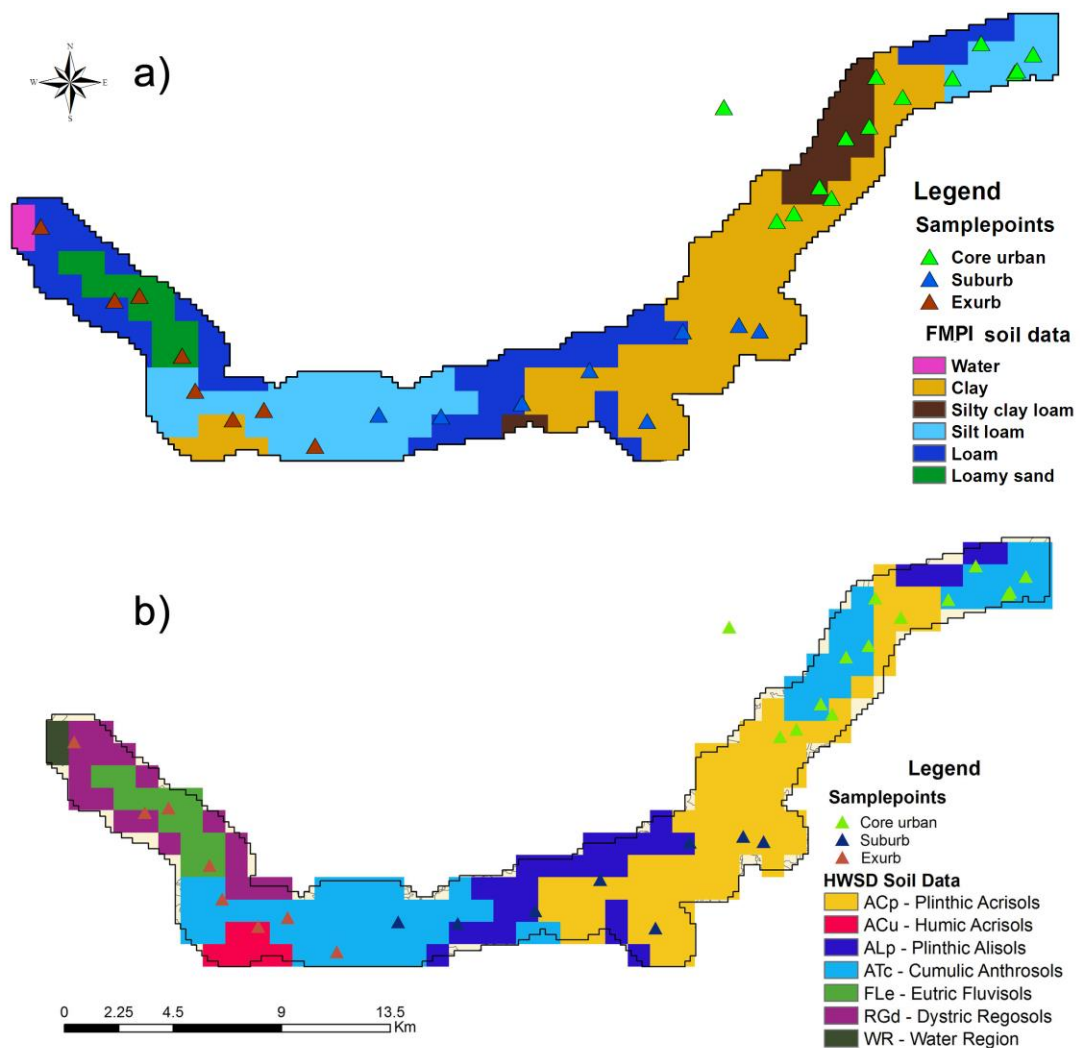

**Figure S1.** The FMPI soil texture and Food and Agriculture Organization (FAO90) soil type from Harmonized World Soil Database, HWSD in study area. HWSD Sources: Fischer, G., F. Nachtergaele, S. Prieler, H.T. van Velthuisen, L. Verelst, D. Wiberg, check names 2008. Global Agro-ecological Zones Assessment for Agriculture (GAEZ 2008). IIASA, Laxenburg, Austria and FAO, Rome, Italy.

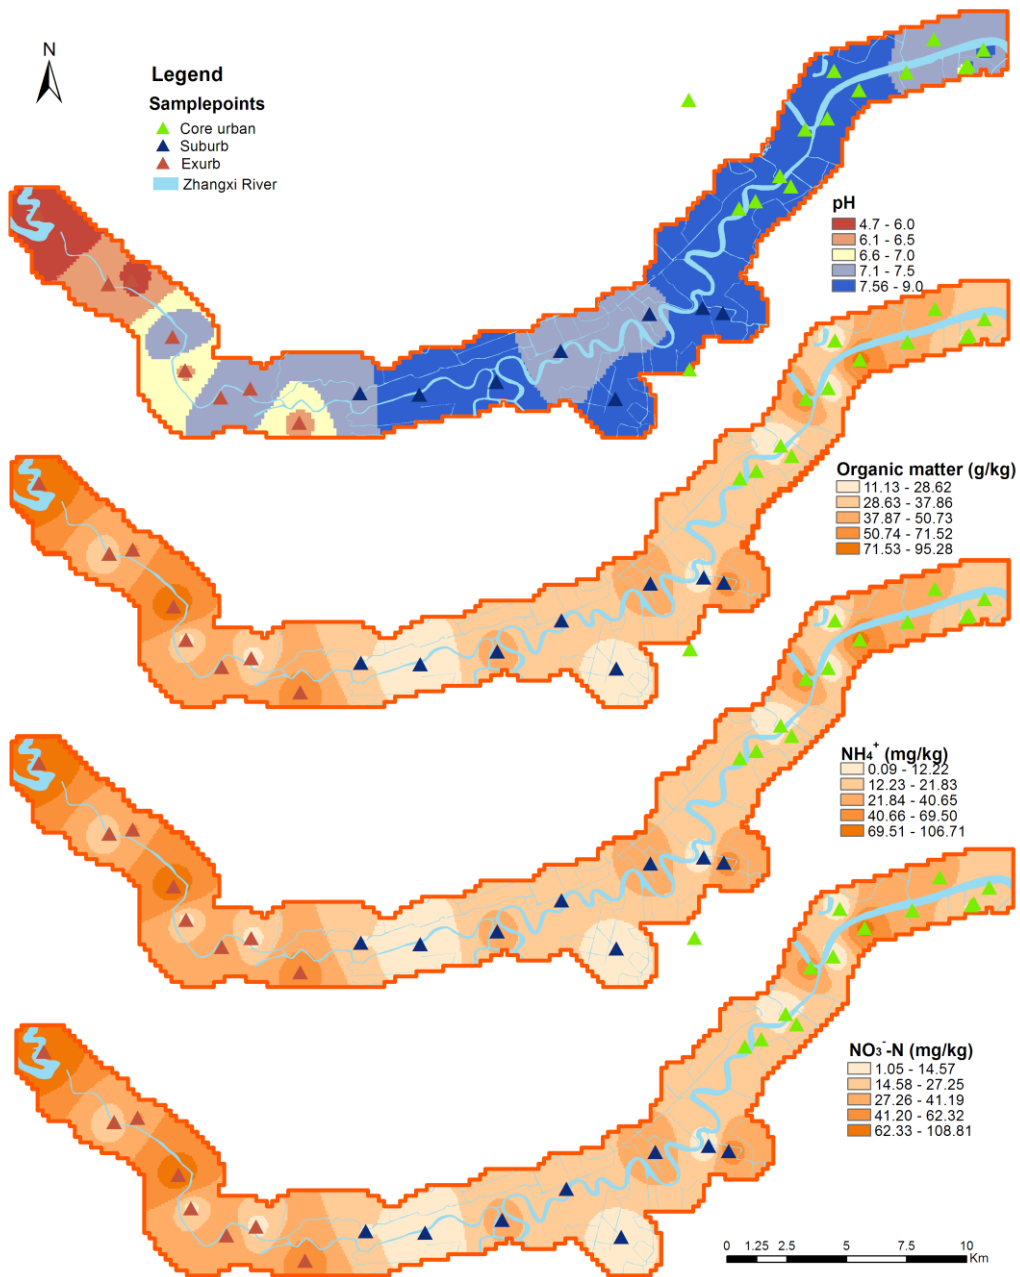

**Figure S2.** The spatial distributions of pH, organic matter, NH<sub>4</sub><sup>+</sup> and NO<sub>3</sub><sup>-</sup>-N during the urbanization gradients

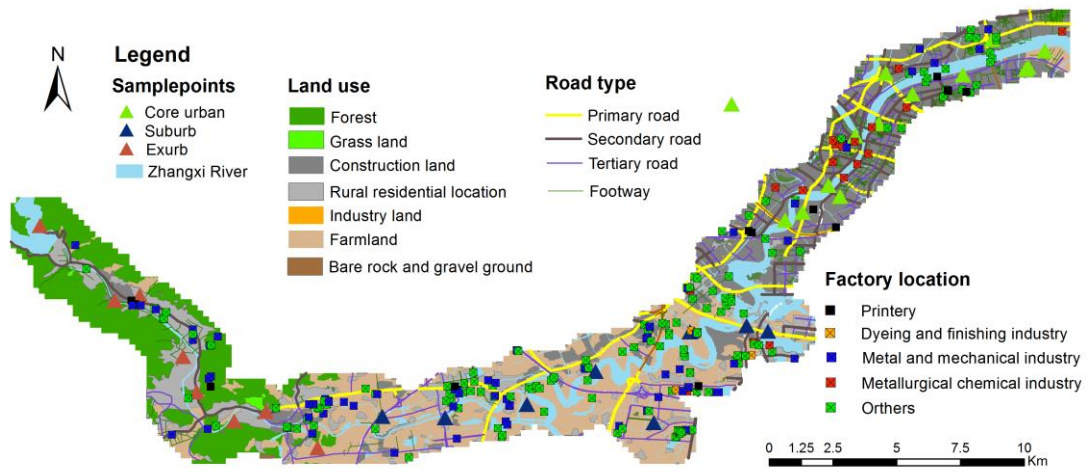

Figure S3. Land use, road network and factory locations in the study area
